# Supplementary material for: Investigation on Low Frequency Bandgap of Coupled Double Beam with Quasi-Zero Stiffness for Power Transformer Vibration Control
Source: Hindawi journal article supplement (doi:10.1155/2022/5029189), 2022-12-31
Supplement: f1 [file 5029189.f1.docx]

**Appendix A**

The coefficient *T*j (j=1~4) in equations (37) and (38) can be expressed as

Where , , , , , , , , and .
